# Supplementary material for: Effects of size on the photocatalytic properties of high-index faceted pseudocubic and rhombohedral α-Fe2O3 nanocrystals
Source: Royal Society of Chemistry journal article supplement (doi:10.1039/c9ra08561k), 2019-01-01
Supplement: c9ra08561k1.pdf [file c9ra08561k1.pdf]

## *Supplementary Information*

### **Effects of size on the photocatalytic property of high-index faceted pseudocubic and rhombohedral $\alpha$ -Fe<sub>2</sub>O<sub>3</sub> nanocrystals**

<sup>a</sup>Ministry Key Laboratory of Oil and Gas Fine Chemicals, College of the Chemistry and Chemical Engineering, Xinjiang University, Urumqi 830046, China.

<sup>b</sup>Guangdong Provincial Key Laboratory of Petrochemical Pollution Processes and Control, School of Environmental Science and Engineering, Guangdong University of Petrochemical Technology, Maoming, Guangdong 525000, China

<sup>c</sup>The Key Laboratory of Pollution Control and Ecosystem Restoration in Industry Clusters (Ministry of Education), School of Environment and Energy, South China University of Technology, Guangzhou 510006, China.

\*Corresponding author:

Email: jerryang1924@163.com

#### **Quantum yield calculation**

$$\Phi = 4 \times \frac{\text{initial rate of O}_2 \text{ production (mol s}^{-1}\text{)}}{\text{photo flux (mol s}^{-1}\text{)}} \quad (4 \text{ photons absorbed per O}_2\text{).}$$

#### **Taking the Fe<sub>2</sub>O<sub>3</sub>-6.0 as an example**

Using a wavelength of 420 nm, the intensity of light measured at 100 mW/cm<sup>2</sup>, impinging on 7 cm<sup>2</sup> surface area. O<sub>2</sub> released at the 2 min reaction time was used for determining.

Energy of a single photon at 420 nm =  $h.c/l = 6.626 \times 10^{-34} \times 2.998 \times 10^8 / (420 \times 10^{-9}) = 4.730 \times 10^{-19}$  J

$$\text{Total power absorbed} = 7 \text{ cm}^2 \times 100 \text{ mW/cm}^2 \times 2 \times 60 \text{ s} = 84 \text{ J}$$

$$\text{Number of O}_2 \text{ molecules produced} = 7.32 \text{ } \mu\text{mol} \times 6.022 \times 10^{23} = 4.41 \times 10^{18}$$

$$\text{Quantum Yield O}_2 = 4.41 \times 10^{18} / (84 \text{ J} / 4.73 \times 10^{-19} \text{ J}) \times 400 \% = 9.93 \%$$

### **Turn over Frequency calculation**

#### **Taking the Fe<sub>2</sub>O<sub>3</sub>-6.0 as an example**

$$\text{Moles of Fe} = 2 \times 5 \text{ mg} / 159.6882 \text{ g mol}^{-1} = 6.26 \times 10^{-5} \text{ mol}$$

The production of O<sub>2</sub> = 7.32 μmol (2 min)

$$\text{TOF} = 7.32 \text{ } \mu\text{mol} / 6.26 \times 10^{-5} \text{ mol} / 120 \text{ s}$$

$$\text{TOF} = 0.97 \times 10^{-3} \text{ mol (O}_2\text{)/mol (Fe) s}$$

TOF for other catalysts were determined similarly.

### **The computational process of the valence band and conduction band of $\alpha$ -Fe<sub>2</sub>O<sub>3</sub>:**

$$E_{CB} = X - E_C - \frac{1}{2} E_g$$

$$\begin{aligned} X &= \sqrt[x+y]{X_{Fe}^x \times X_O^y} \\ &= \sqrt[5]{4.06^2 \times 7.54^3} \\ &= 5.886 \text{ eV} \end{aligned}$$

#### **Taking the Fe<sub>2</sub>O<sub>3</sub>-6.0 as an example**

$$E_g = 1.964 \text{ eV}$$

$$E_{CB} = 5.886 - 4.5 - 0.5 \times 1.964$$

$$= 0.404 \text{ eV}$$

$$E_{VB} = E_{CB} + E_g$$

$$= 0.404 + 1.964$$

$$= 2.368 \text{ eV}$$
